# Supplementary material for: The circadian calling activity of a lebinthine cricket with high-frequency calls is unaffected by cicada choruses in the day
Source: PeerJ journal article supplement (doi:10.7717/peerj.14641), 2023-01-12
Supplement: Table_S1.pdf [file Table_S1.pdf]

**Table S1.** Description of the calling activity and peak frequency of some sympatric low-frequency calling crickets and katydids. <sup>+1</sup> refers to the next following day.

| <b>Species</b>                 | <b>Calling activity</b>                               | <b>Peak frequency (kHz)</b> | <b>Reference</b>        |
|--------------------------------|-------------------------------------------------------|-----------------------------|-------------------------|
| <i>Ornebius</i> spp.           | 21h–4h <sup>+1</sup>                                  | 6.1–8.1                     | Tan et al. under review |
| <i>Gymnogryllus</i> spp.       | 18h–4h <sup>+1</sup>                                  | 4.4–5.9                     | Tan et al. 2018         |
| <i>Velarifictorus aspersus</i> | 19h–6h <sup>+1</sup><br>One case 17h–8h <sup>+1</sup> | 4.8–5.2                     | Ingrisch 1998           |
| <i>Mecopoda sismondoi</i>      | 19h–3h <sup>+1</sup>                                  | 5–10                        | Heller et al. 2021      |
